# Supplementary material for: PAMAM dendrimers for efficient siRNA delivery and potent gene silencing
Source: Royal Society of Chemistry journal article supplement (doi:10.1039/b601381c), 2006-01-01
Supplement: b601381c.pdf [file b601381c.pdf]

## **PAMAM dendrimers for efficient siRNA delivery and potent gene silencing**

Jiehua Zhou, Jiangyu Wu, Nadia Hafdi, Jean-Paul Behr, Patrick Erbacher, Ling Peng

### **Supporting Information**

#### **Materials and Methods**

Samples of siRNA were purchased from ProLigo LLS (Colorado, USA). For GL3Luc siRNA and GL2Luc siRNA, respectively, the sequences of antisense are 5'-UCG AAG UAC UCA GCG UAA G dTdT-3' and 5'-CGU ACG CGG AAU ACU UCG A dTdT-3', and those of sense are 3'-dTdT AGC UUC AUG AGU CGC AUU C-5' and 3'-dTdT GCA UGC GCC UUA UGA AGC U-5'. All other reagents and solvents of analytical grade were used without further purification from commercial sources. Sodium dodecyl sulfate (SDS) was supplied from Sigma. RNase A was purchased from Jingmei Biotech Co., Ltd. (Shenzhen, China). Oligonucleotides (GL3- and GL2Luc) were chemically synthesised and PAGE purified by Eurogentec (Belgium). Oligonucleotides were annealed in 1 × Annealing buffer (50 mM potassium acetate, 50 mM magnesium acetate) (Eurogentec) for 2 min at 95°C, followed by 2-4 hours incubation at room temperature. IR spectra were recorded with a PERKIN ELMER spectrophotometer. <sup>1</sup>H NMR and <sup>13</sup>C NMR spectra were measured at 300 MHz and 75 MHz relatively on a Varian Mercury-VX300 spectrometer. HPLC were performed on a Waters<sup>TM</sup> 600 pump with a Waters 600 controller and the components were detected using a Waters 2996 photodiode array detector. Two HPLC C<sub>8</sub> columns, Agilent ZORBAX C8 (4.6 × 150 mm) and Nucleosil C8 (4.0 × 250 mm), were used for HPLC analysis.

#### **Dendrimer synthesis and characterization**

The PAMAM dendrimers were synthesized as previously described<sup>1</sup> and characterized by IR, NMR, MS and HPLC. FT-IR is a convenient and effective technique to characterize PAMAM dendrimers. The half generation dendrimers have the methyl ester terminating groups, which have the

characteristic IR peaks for carbonyl at 1730-1750  $\text{cm}^{-1}$ . For the full generation dendrimers, when the methyl ester groups were converted to amide groups, the corresponding carbonyl shifted to 1660  $\text{cm}^{-1}$ . The NMR data corroborated well with the FT-IR data to confirm the structure of the dendrimers. The characteristic methyl ester peak, which appeared in all the  $^1\text{H}$ -NMR spectra of the ester terminating dendrimers, was absent in the spectra of all the amine terminating dendrimers. HPLC analysis showed a major peak for dendrimer of each generation, with purities of 95%, 90%, 90%, 85%, 80%, 80% and 70% for dendrimers from generation 1 to 7, respectively. The molecular weights of the lower-generation dendrimers were determined by electron-spray mass spectroscopy,<sup>1</sup> while those of the higher-generation dendrimers could not yet be obtained. Work on determining the molecular weight of the higher-generation dendrimers are under way using MALDI TOF mass spectroscopy, GPC analysis and Diffusion-ordered NMR spectroscopy (DOSY NMR).

### **Potentiometric pH titration of dendrimer**

The dendrimer **G**<sub>7</sub> was diluted and the concentration of primary amine was 5 mM. The pH titrations were carried out with the above mentioned dendrimer solution (17.1 mL) and 100 mM HCl using a Mettler Toledo 320-S pH meter.

### **Agarose gel analysis of siRNA/dendrimer complexes**

The dendrimers were diluted to an appropriate concentration in 50 mM Tris-HCl buffer (pH 7.6), with all solutions stored at 4°C. The siRNA was diluted with H<sub>2</sub>O. Both solutions were mixed at various N/P (= [total end amines in cationic dendrimer] / [phosphates in siRNA]) and incubated at 37°C for 30 min with indicated pH and NaCl concentration. The final concentration of siRNA was adjusted to 25 ng/ $\mu\text{L}$  (100 ng/well). siRNA/dendrimer complexes were analyzed by electrophoretic mobility-shift assays in 1.2% agarose gel in standard TAE buffer. The siRNA bands were stained by ethidium bromide and then detected by a Kodak 290 digital camera.

### **Stability of siRNA/dendrimer complex against RNase A**

An aliquot of 1  $\mu\text{g}$  of siRNA and the indicated amounts of dendrimers was kept at 37°C for 30 min.

Then the complexes were incubated in the presence of 0.01  $\mu\text{g}/\mu\text{L}$  RNase A for 0, 5, 15, 20, 30 and 45 min at 37°C. Aliquots (4  $\mu\text{L}$ ) of the corresponding solution were withdrawn, added to 1.5  $\mu\text{L}$  1% SDS solution at 4°C and then subjected to electrophoresis in 1.2% agarose gel in standard TAE buffer. The siRNA bands were stained by ethidium bromide and then detected by a Kodak 290 digital camera.

### **Transmission electron microscope Imaging.**

Studies were performed with a Hitachi H-7000FA electron microscope instrument. 20  $\mu\text{L}$  of a solution of siRNA (5 ng/ $\mu\text{L}$ ) were mixed with 20  $\mu\text{L}$  of a solution of G<sub>7</sub> dendrimer in 50 mM Tris-HCl buffer (34.4 ng/ $\mu\text{L}$ ). After equilibration (3 min), 4  $\mu\text{L}$  of this mixture were dropped on a standard carbon-coated copper TEM grid, and then allowed to evaporate (1 h at 30°C, ambient pressure). The grid was then stained with uranyl acetate (2% in water, pH 4.5) for 3 min. Imaging was performed immediately after air-dried for 20 min.

### **Cell culture**

A549 (human lung carcinoma, ATCC N° CCL-185) cells stably expressing the GL3 luciferase (*Photinus pyralis* luciferase under the control of SV40 elements) were obtained after stable transfection of pGL3Luc plasmid (Clontech). A549-GL3Luc cells were grown in RPMI (Eurobio) and supplemented with 10% fetal bovine serum, 2 mM glutamax, 100 units/mL penicillin, 100  $\mu\text{g}/\text{mL}$  streptomycin and 0.8  $\mu\text{g}/\text{mL}$  G418 (Promega). Cells were maintained at 37°C in a 5% CO<sub>2</sub> humidified atmosphere.

### **siRNA Transfection**

One day before transfection,  $2.5 \times 10^4$  cells per well were seeded in 24-well tissue culture plate in 1 mL fresh complete medium containing 10% FBS. Before transfection, complexes of siRNA/dendrimer reagent were prepared. The desired amount of siRNA and dendrimer reagent was diluted in 150  $\mu\text{L}$  of serum-free medium (for a triplicate experiment). The solutions were mixed with a Vortex for 10 seconds, and left for 10 minutes at room temperature. The dendrimer reagent was added to the siRNA solution, homogenized for 10 seconds with a Vortex and left 30 minutes at room temperature. Before adding the transfection complexes, the complete medium with serum

was removed and replaced with 0.5 mL of serum-free medium. Then, 100  $\mu$ L of complexes solution was added per well and the plates were incubated at 37°C. After 2 h of incubation, the complete medium was removed and replaced with 1 mL of complete medium containing 10% serum. The plate was further incubated at 37°C for 24 or 48 h.

### **Luciferase and protein assay**

Luciferase gene expression was measured using a commercial kit (Promega, France). After removing the complete medium, three washings with 1 mL of PBS solution were made. Then, 100  $\mu$ L of 1  $\times$  lysis buffer were added per well, and the plate was incubated at room temperature for 30 minutes. The lysates were collected and centrifuged at 14,000 g for 5 minutes. The luciferase assay was assessed with 5  $\mu$ L of lysate after injection of 100  $\mu$ L of luciferin solution. The luminescence (RLU) was monitored with an integration over 10 seconds with a luminometer (Berthold, France). Results are expressed as light units integrated over 10 seconds (RLU), per mg of cell protein using the BCA assay (Pierce, France).

### **Cytotoxicity Assay**

Cell viability was determined by MTT assay. Cells were incubated in 1 mL of PBS containing 40  $\mu$ L/mL of MTT (stock solution at 5 mg/ml) at 37°C for 2 h. Then, cells were washed with 1 mL of PBS three times and 200  $\mu$ L of DMSO were added per well. The absorbance was determined at 570 nm and the viability was expressed as the ratio of absorbance obtained from transfected cells to non-transfected cells (n=6).

1. J. Y. Wu, J. H. Zhou, F. Q. Qu, P. H. Bao, Y. Zhang, L. Peng, *Chem. Commun.*, **2005**, 313-315.
